# Supplementary material for: The structures of borane carbonyl compounds B4X6CO (X = F, Cl, Br and I) by gas-phase electron diffraction and ab initio calculationsElectronic supplementary information (ESI) available: least-squares correlation matrix for electron diffraction structure refinement for B(BF2)3CO; tables of geometric parameters for B4X6CO and B2X4 (X = F, Cl, Br and I). See http://www.rsc.org/suppdata/dt/b2/b207192d/
Source: Royal Society of Chemistry journal article supplement (doi:10.1039/b207192d), 2002-10-24
Supplement: b207192d.doc [file b207192d.doc]

The structures of borane carbonyl compounds B4X6CO (X = F, Cl, Br and I) by gas-phase electron diffraction and *ab initio* calculations.

Iain D. Mackie,a Sarah L. Hinchley,a Heather E. Robertson,a David W. H. Rankin,*a Jennifer A. J. Pardoe,b Peter L. Timms.*b

*a Department of Chemistry, University of Edinburgh, West Mains Road, Edinburgh, UK EH9 3JJ. E-mail: d.w.h.rankin@ed.ac.uk*

b The University of Bristol, School of Chemistry, Bristol, UK BS8 1TS. E-mail: peter.timms@bristol.ac.uk

This submission was created using the RSC Article Template (DO NOT DELETE THIS TEXT)

(LINE INCLUDED FOR SPACING ONLY - DO NOT DELETE THIS TEXT)

**Table S1:** Least-squares correlation matrix (x100) for electron diffraction structure refinement for B(BF2)3CO.a

|  | *p*2 | *p*5 | *u*5 | *u*6 | *u*9 | *u*10 | *u*12 | *u*15 | *k*1b |
| --- | --- | --- | --- | --- | --- | --- | --- | --- | --- |
| *p*2 |  | 61 |  |  |  |  |  |  | 52 |
| *p*4 | -50 |  | -62 |  | -50 |  |  |  |  |
| *p*6 |  | 64 |  |  |  |  |  |  |  |
| *p*8 |  |  |  |  | 66 |  | 66 |  |  |
| *u*1 |  |  |  |  |  |  |  |  | 67 |
| *u2* |  |  |  |  |  | 66 |  | 51 | 61 |
| *u*4 |  |  | 58 | 71 |  |  |  |  |  |
| *u*7 |  |  |  |  | -62 |  |  |  |  |
| *u*12 |  |  |  |  | 67 |  |  |  |  |
| *u*22 | 60 |  |  |  |  |  |  |  |  |
| *u*23 |  |  |  |  |  |  |  | 55 |  |

a Only elements with absolute values >50% are shown.

b Scale factor.

**Table S2:** Geometric parameters for B(BF2)3CO (*r*e/pm, angles in º).

| Geometric parameter | Level of theory/ Basis set | | | | | | |
| --- | --- | --- | --- | --- | --- | --- | --- |
| HF | | MP2 | | B3LYP | | |
| 3-21G* | 6-31G* | 6-31G* | 6-311G* | 6-31G* | GENb | 6-31+G* |
| *R*OC | 112.3 | 110.8 | 115.2 | 114.1 | 114.2 | 113.7 | 114.0 |
| *R*CB | 154.4 | 156.9 | 150.2 | 150.6 | 149.7 | 150.7 | 150.6 |
| *R*BB | 168.6 | 171.5 | 169.1 | 169.2 | 170.3 | 170.8 | 171.1 |
| *r*BFma | 134.5 | 131.5 | 133.5 | 132.8 | 132.7 | 133.3 | 133.2 |
| *r*BFda | 0.8 | 1.1 | 0.9 | 0.9 | 0.7 | 0.0 | 1.0 |
| CBB | 110.3 | 108.1 | 110.2 | 110.0 | 110.4 | 109.2 | 109.4 |
| BBFm | 122.6 | 122.0 | 121.7 | 121.7 | 121.7 | 121.9 | 121.9 |
| BBFda | 2.2 | 1.7 | 2.5 | 2.0 | 2.9 | 1.4 | 1.7 |
| FBF | 114.9 | 116.0 | 116.6 | 116.6 | 116.6 | 116.1 | 116.2 |
| CBBF | 0.0 | 0.0 | 0.0 | 0.0 | 0.0 | 0.0 | 0.0 |
| Energyc | -804.1550 | -808.4922 | -810.1211 | -810.5703 | -812.1559 | -812.1956 | -812.2082 |

a m = mean, d = difference.

b 6-31G* on B, C, O atoms and 6-31+G* on F atoms.

c absolute energy in Hartrees.

**Table S3:** Geometric parameters for B(BCl2)3CO (*r*e/pm, angles in º).

| Geometric parameter | Level of theory/ Basis set | | | | | | |
| --- | --- | --- | --- | --- | --- | --- | --- |
| HF | | MP2 | | B3LYP | | |
| 3-21G* | 6-31G* | 6-31G* | 6-311G* | 6-31G* | GENb | 6-31+G* |
| *R*OC | 112.1 | 110.5 | 115.1 | 114.0 | 113.8 | 113.9 | 113.9 |
| *R*CB | 159.0 | 160.7 | 151.6 | 151.6 | 152.1 | 152.1 | 152.1 |
| *R*BB | 171.7 | 173.2 | 170.1 | 169.9 | 172.2 | 172.2 | 172.3 |
| *r*BClma | 176.6 | 176.4 | 174.9 | 175.1 | 176.7 | 176.6 | 176.7 |
| *r*BClda | 3.0 | 2.5 | 2.8 | 2.1 | 2.3 | 1.1 | 2.2 |
| CBB | 107.4 | 106.3 | 107.6 | 107.6 | 107.3 | 107.3 | 107.3 |
| BBClm | 121.5 | 121.9 | 121.4 | 121.2 | 121.7 | 121.7 | 121.7 |
| BBClda | 2.2 | 0.9 | 0.5 | 0.6 | 0.6 | 0.6 | 0.4 |
| ClBCl | 117.1 | 116.3 | 117.3 | 117.5 | 116.6 | 116.6 | 116.5 |
| CBBCl | 0.0 | 0.0 | 0.0 | 0.0 | 0.0 | 0.0 | 0.0 |
| Energyc | -2954.9296 | -2968.6159 | -2970.0236 | -2970.8036 | -2974.1672 | -2974.1538 | -2974.1794 |

a m = mean, d = difference.

b 6-31G* on B, C, O atoms and 6-31+G* on Cl atoms.

c absolute energy in Hartrees.

**Table S5:** Geometric parameters for B(BI2)3CO (*r*e/pm, angles in º).

| Geometric parameter | Level of theory/ Basis set | | | | | | | | |
| --- | --- | --- | --- | --- | --- | --- | --- | --- | --- |
| HF | | | | MP2 | | B3LYP | | |
| 3-21G* | 6-31G* b | 6-311G*c | 6-311+G*d | 6-31G*b | 6-311G*c | 6-31G* b | 6-311G*c | 6-311+G*d |
| *R*OC | 112.2 | 110.6 | 109.8 | 107.8 | 115.6 | 114.5 | 114.1 | 113.2 | 113.2 |
| *R*CB | 158.1 | 160.2 | 159.6 | 159.5 | 150.6 | 150.3 | 151.6 | 151.0 | 150.9 |
| *R*BB | 172.7 | 174.3 | 174.1 | 174.2 | 171.1 | 171.1 | 173.2 | 172.8 | 172.8 |
| *r*BIma | 217.5 | 216.4 | 215.8 | 215.8 | 214.2 | 121.3 | 215.6 | 215.1 | 215.2 |
| *r*BIda | 2.3 | 2.4 | 2.3 | 2.3 | 1.7 | 1.5 | 2.0 | 1.9 | 1.8 |
| CBB | 107.2 | 106.0 | 106.1 | 106.1 | 107.4 | 107.6 | 106.4 | 106.6 | 106.7 |
| BBIma | 121.4 | 121.8 | 121.8 | 121.8 | 121.1 | 120.8 | 121.7 | 121.6 | 121.6 |
| BBIda | 3.2 | 2.1 | 2.2 | 2.2 | 1.2 | 1.5 | 1.5 | 1.5 | 1.4 |
| IBI | 117.1 | 116.4 | 116.4 | 116.4 | 117.7 | 118.2 | 116.7 | 116.7 | 116.7 |
| CBBI | 32.0 | 33.8 | 34.3 | 34.1 | 36.4 | 38.1 | 33.6 | 34.6 | 34.8 |
| Energye | -41537.8816 | -278.5559 | -278.6132 | -278.6176 | -279.4728 | -279.5947 | -281.1885 | -281.2437 | -281.2490 |

a m = mean, d = difference.

b 6-31G* on B, C, O atoms and lanl2dz on I atoms.

c 6-311G* on B, C, O atoms and lanl2dz on I atoms.

d 6-311+G* on B, C, O atoms and lanl2dz on I atoms.

e absolute energy in Hartrees.

**Table S4:** Geometric parameters for B(BBr2)3CO (*r*e/pm, angles in º).

| Geometric parameter | Level of theory/ Basis set | | | | | | | |
| --- | --- | --- | --- | --- | --- | --- | --- | --- |
| HF | | | MP2 | | B3LYP | | |
| 3-21G* | 6-31G* | CEPb | 6-31G* | 6-311G* | 6-31G* | GENc | 6-31+G* |
| *R*OC | 112.2 | 110.5 | 110.5 | 115.0 | 114.0 | 113.8 | 113.8 | 113.9 |
| *R*CB | 158.6 | 161.3 | 161.8 | 152.1 | 152.4 | 152.4 | 152.9 | 152.7 |
| *R*BB | 170.9 | 172.8 | 173.9 | 169.9 | 170.5 | 171.7 | 172.4 | 172.0 |
| *r*BBrma | 190.8 | 191.8 | 193.0 | 190.9 | 191.6 | 191.5 | 192.6 | 192.1 |
| *r*BBrda | 3.1 | 2.9 | 3.1 | 2.9 | 2.7 | 2.6 | 2.7 | 2.3 |
| CBB | 107.5 | 106.8 | 105.7 | 108.2 | 106.9 | 107.7 | 106.6 | 106.7 |
| BBBrma | 120.9 | 121.4 | 122.2 | 121.0 | 121.5 | 121.2 | 122.0 | 121.8 |
| BBBrda | 2.6 | 0.6 | 2.1 | 1.0 | 2.3 | 0.3 | 1.8 | 1.3 |
| BrBBr | 118.3 | 117.1 | 115.6 | 118.0 | 116.9 | 117.6 | 116.1 | 116.5 |
| CBBBr | 0.0 | 0.0 | 0.0 | 0.0 | 0.1 | 0.0 | 0.0 | 0.0 |
| Energyd | -15572.1615 | -15631.0522 | -290.5230 | -15632.3546 | -15647.3655 | -15643.2085 | -15528.0605 | -15641.3349 |

a m = mean, d = difference.

b 6-31G* on B, C, O atoms and CEP-4G on Br atoms.

c 6-31G* on B, C, O atoms and 6-31+G* on Br atoms.

d absolute energy in Hartrees.

**Table S7:** Geometric parameters for B2Cl4 (*r*e/pm, angles in º).

| Geometric parameter | Level of theory/ Basis set | | | | | | |
| --- | --- | --- | --- | --- | --- | --- | --- |
| HF | | MP2 | | B3LYP | | |
| 3-21G* | 6-31G* | 6-31G* | 6-311G* | 6-31G* | 6-311G* | 6-311+G* |
| *R*BB | 168.9 | 170.9 | 169.1 | 169.1 | 169.3 | 168.6 | 168.5 |
| *R*BCl | 175.3 | 175.2 | 174.0 | 174.2 | 175.9 | 175.6 | 175.7 |
| ClBCl | 120.283 | 119.597 | 119.855 | 119.963 | 119.486 | 119.413 | 119.346 |
| ClBB | 119.858 | 120.202 | 120.072 | 120.018 | 120.257 | 120.293 | 120.327 |
| ClBBCl | 90 | 90 | 90 | 90 | 90 | 90 | 90 |
| Energy a | -1878.8425 | -1887.4585 | -1888.1306 | -1888.2806 | -1890.6458 | -1890.7696 | -1890.7750 |

a absolute energy in Hartrees.

**Table S8:** Geometric parameters for B2Br4 (*r*e/pm, angles in º).

| Geometric parameter | Level of theory/ Basis set | | | | | | |
| --- | --- | --- | --- | --- | --- | --- | --- |
| HF | | MP2 | | B3LYP | | |
| 3-21G* | 6-31G* | 6-31G* | 6-311G* | 6-31G* | 6-311G* | 6-311+G* |
| *R*BB | 166.8 | 169.5 | 167.9 | 168.1 | 167.6 | 167.3 | 167.3 |
| *R*BBr | 189.5 | 190.5 | 190.0 | 190.4 | 190.7 | 191.9 | 192.0 |
| BrBBr | 121.850 | 120.816 | 121.283 | 121.120 | 120.648 | 120.860 | 120.223 |
| BrBB | 119.075 | 119.592 | 119.358 | 119.440 | 119.676 | 119.860 | 119.889 |
| BrBBBr | 90 | 90 | 90 | 90 | 90 | 90 | 90 |
| Energy a | -10290.3293 | -10329.0792 | -10329.0791 | -10338.9937 | -10336.6690 | -10346.4329 | -10346.4349 |

a absolute energy in Hartrees.

**Table S9:** Geometric parameters for B2I4 (*r*e/pm, angles in º).

| Geometric parameter | Level of theory/ Basis set | | | | | | |
| --- | --- | --- | --- | --- | --- | --- | --- |
| HF | | MP2 | | B3LYP | | |
| 3-21G* | 6-31G* | 6-31G* | 6-311G* | 6-31G*a | 6-311G*b | 6-311+G*c |
| *R*BB | 166.7 | 168.6 | 166.6 | 166.4 | 166.6 | 165.7 | 165.7 |
| *R*BI | 215.5 | 214.4 | 212.6 | 210.9 | 214.1 | 213.7 | 213.7 |
| IBI | 121.892 | 121.330 | 122.213 | 122.848 | 121.208 | 121.416 | 121.416 |
| IBB | 119.054 | 119.335 | 118.894 | 118.576 | 119.396 | 119.292 | 119.292 |
| IBBI | 90 | 90 | 90 | 90 | 90 | 90 | 90 |
| Energy d | -27600.8214 | -94.0953 | -94.4391 | -94.4762 | -95.3395 | -95.3507 | -95.3522 |

a 6-31G* on B, C, O atoms and lanl2dz on I atoms.

b 6-311G* on B, C, O atoms and lanl2dz on I atoms.

c 6-311+G* on B, C, O atoms and lanl2dz on I atoms.

e absolute energy in Hartrees

**Table S6:** Geometric parameters for B2F4 (*r*e/pm, angles in º).

| Geometric parameter | Level of theory/ Basis set | | | | | | |
| --- | --- | --- | --- | --- | --- | --- | --- |
| HF | | MP2 | | B3LYP | | |
| 3-21G* | 6-31G* | 6-31G* | 6-311G* | 6-31G* | 6-311G* | 6-311+G* |
| *R*BB | 168.8 | 172.8 | 171.6 | 171.6 | 171.6 | 171.0 | 171.0 |
| *R*BF | 133.9 | 131.0 | 133.0 | 132.4 | 132.5 | 132.4 | 132.6 |
| FBF | 115.482 | 116.860 | 117.011 | 117.131 | 116.854 | 116.712 | 116.751 |
| FBB | 122.259 | 121.570 | 121.495 | 121.435 | 121.573 | 121.644 | 121.625 |
| FBBF | 90 | 90 | 90 | 90 | 90 | 90 | 90 |
| Energy a | -444.9748 | -447.3669 | -448.1918 | -448.4515 | -449.2933 | -449.4300 | -449.4443 |

a absolute energy in Hartrees.
